# Supplementary material for: A 5-lncRNA Signature Associated with Smoking Predicts the Overall Survival of Patients with Muscle-Invasive Bladder Cancer
Source: Hindawi journal article supplement (doi:10.1155/2021/8839747), 2021-01-18
Supplement: f1 [file 8839747.f1.zip]

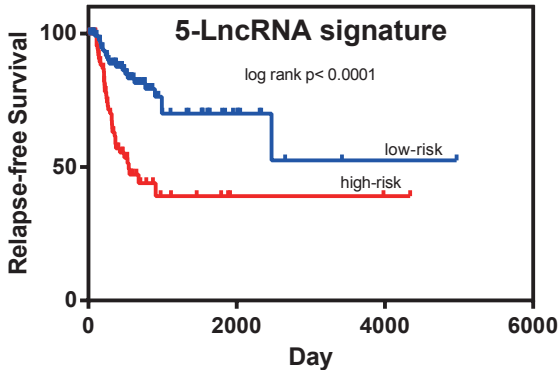

**FigS1** Kaplan – Meier estimates of RSF of patients with MIBC between high-risk and low-risk using the five-lncRNA signature. RSF=Relapse-free survival
