# Supplementary material for: A 5-lncRNA Signature Associated with Smoking Predicts the Overall Survival of Patients with Muscle-Invasive Bladder Cancer
Source: Dis Markers. 2021 Jan 18;2021:8839747. doi: 10.1155/2021/8839747 (PMC7914096; doi:10.1155/2021/8839747)
Supplement: Supplementary Materials — Supplementary Figure 1: Kaplan-Meier estimates of RSF of patients with MIBC between high-risk and low-risk groups using the 5-lncRNA signature. RSF: relapse-free survival. Supplementary Table 1: the group after the propensity score matching. [file 8839747.f1.zip › Table S1.csv]

The group after the Propensity Score Matching
sampleID	group	X_EVENT	X_OS	X_OS_IND	X_PANCAN_CNA_PANCAN_K8	X_PANCAN_Cluster_Cluster_PANCAN	X_PANCAN_DNAMethyl_BLCA	X_PANCAN_DNAMethyl_PANCAN	X_PANCAN_RPPA_PANCAN_K8	X_PANCAN_UNC_RNAseq_PANCAN_K16	X_PANCAN_miRNA_PANCAN	X_PANCAN_mirna_BLCA	X_PANCAN_mutation_PANCAN	X_RFS	X_RFS_IND	X_TIME_TO_EVENT	additional_pharmaceutical_therapy	additional_radiation_therapy	additional_surgery_locoregional_procedure	additional_treatment_completion_success_outcome	age_at_initial_pathologic_diagnosis	age_began_smoking_in_years	anatomic_neoplasm_subdivision	cancer_diagnosis_cancer_type_icd9_text_name	chemical_exposure_text	clinical_T	complete_response_observed	days_to_additional_surgery_metastatic_procedure	days_to_birth	days_to_collection	days_to_death	days_to_initial_pathologic_diagnosis	days_to_last_followup	days_to_new_tumor_event_additional_surgery_procedure	days_to_new_tumor_event_after_initial_treatment	diagnosis_subtype	disease_code	disease_extracapsular_extension_ind_3	eastern_cancer_oncology_group	family_member_relationship_type	followup_case_report_form_submission_reason	gender	height	weight	hist_of_non_mibc	histological_type	history_of_neoadjuvant_treatment	induction_course_complete	informed_consent_verified
TCGA-BL-A5ZZ-01	0	0	377	0										242	1	377	YES	NO		Progressive Disease	80	38	Wall Posterior					NA	-29247	NA	NA	0	377	NA	242	Papillary			1			FEMALE	163	71	NO	Muscle invasive urothelial carcinoma (pT2 or above)	No		YES
TCGA-BT-A0YX-01	0	1	400	1	Kirc+	C2-Squamous-like	cluster 1	Cluster 14 (HNSC)	BRCA basal-like c6	squamous-like c4	miRNA cluster 11	cluster 3	mutation cluster 7	326	1	400	YES		NO	Progressive Disease	70	NA	Bladder - NOS	Prostate|Colon	None known	T3b		NA	-25570	296	400	0	363	NA	326	Non-Papillary		YES	NA	Father|Sister		FEMALE	NA	NA		Muscle invasive urothelial carcinoma (pT2 or above)	No		YES
TCGA-BT-A2LA-01	1	0	522	0	BRCA-LUAD+	C11-small-various	cluster 4	Cluster 6	KIRC-like c1	GBM-like c6	miRNA cluster 12	cluster 1	mutation cluster 5	522	0	522				Complete Response	54	NA	Wall Lateral	Colon|Melanoma		T3a		NA	-20032	257	NA	0	522	NA	NA	Non-Papillary		NO	NA	Mother|Father		MALE	NA	95		Muscle invasive urothelial carcinoma (pT2 or above)	No		YES
TCGA-BT-A42F-01	1	0	864	0										864	0	864				Complete Response	64	NA	Wall Posterior			T4a		NA	-23713	282	NA	0	864	NA	NA	Non-Papillary		YES	NA			MALE	180	102	NO	Muscle invasive urothelial carcinoma (pT2 or above)	No		YES
TCGA-CF-A1HR-01	0	0	389	0	Squamous	C8-BLCA	cluster 1	Cluster 5	BRCA basal-like c6	BLCA nonsquamous-like c1	miRNA cluster 5	cluster 1	mutation c1uster 9	294	1	389	NO	NO		Progressive Disease	62	NA	Bladder - NOS					NA	-22777	64	NA	0	389	NA	294	Non-Papillary			NA			MALE	172	61		Muscle invasive urothelial carcinoma (pT2 or above)	No		YES
TCGA-CF-A1HS-01	0	0	382	0	High	C2-Squamous-like	cluster 2	Cluster 13 (HNSC-LUSC)	BRCA basal-like c6	squamous-like c4	miRNA cluster 11	cluster 3	mutation cluster 5	133	1	382	NO	YES		Stable Disease	75	NA	Bladder - NOS					NA	-27565	56	NA	0	382	NA	133	Non-Papillary			NA			FEMALE	154	52		Muscle invasive urothelial carcinoma (pT2 or above)	No		YES
TCGA-DK-A1A7-01	0	0	560	0	High	C8-BLCA	cluster 4	Cluster 5		BLCA nonsquamous-like c1	miRNA cluster 11	cluster 1	mutation c1uster 10	112	1	560	YES	NO	NO	Stable Disease	67	NA	Trigone	Breast-Fem|Lymphoma	None			NA	-24499	164	NA	0	560	NA	112	Non-Papillary		NO	NA	Sister|Brother	Scheduled Follow-up Submission	FEMALE	148	48		Muscle invasive urothelial carcinoma (pT2 or above)	No		YES
TCGA-DK-A2I6-01	1	0	2656	0	High	C8-BLCA	cluster 3	Cluster 5		BLCA nonsquamous-like c1	miRNA cluster 5	cluster 2	mutation cluster 2	2656	0	2656				Complete Response	81	NA	Trigone	Lung/Bronchus|Lung/Bronchus|Colon	Unspecified chemicals & solvents			NA	-29789	NA	NA	0	2656	NA	NA	Non-Papillary		NO	NA	Sister|Brother|Brother		MALE	178	88.5		Muscle invasive urothelial carcinoma (pT2 or above)	No		YES
TCGA-DK-A3IV-01	0	1	294	1	BRCA-LUAD+	C1-LUAD-enriched	cluster 2	Cluster 6	squamous c3	BLCA nonsquamous-like c1	miRNA cluster 4	cluster 4	mutation cluster 5	212	1	294				Progressive Disease	60	NA	Wall Lateral	Prostate|Lung/Bronchus		T2		NA	-22237	226	294	0	NA	NA	212	Non-Papillary			NA	Brother|Sister		MALE	172	85.4		Muscle invasive urothelial carcinoma (pT2 or above)	No		YES
TCGA-DK-A3X1-01	1	0	2009	0	High	C8-BLCA	cluster 3	Cluster 5	BRCA basal-like c6	BLCA nonsquamous-like c1	miRNA cluster 4	cluster 4		2009	0	2009				Complete Response	78	NA	Dome	Lung/Bronchus	None reported		NO	NA	-28757	1157	NA	0	2009	NA	NA	Non-Papillary			NA	Father		FEMALE	NA	NA	YES	Muscle invasive urothelial carcinoma (pT2 or above)	No	YES	YES
TCGA-E7-A7PW-01	0	0	416	0										174	1	416	NO	YES		Complete Response	63	50	Bladder - NOS					NA	-23057	117	NA	0	416	NA	174	Non-Papillary		YES	NA			MALE	170	55	NO	Muscle invasive urothelial carcinoma (pT2 or above)	No		YES
TCGA-FD-A3B7-01	0	1	122	1	High	C8-BLCA	cluster 1	Cluster 5	BRCA basal-like c6	squamous-like c4	miRNA cluster 5	cluster 4	mutation cluster 5	110	1	122	NO	NO		Progressive Disease	66	16	Wall Lateral			T2		NA	-24245	152	122	0	NA	NA	110	Non-Papillary			NA			MALE	177	59.4		Muscle invasive urothelial carcinoma (pT2 or above)	No		YES
TCGA-FD-A3N5-01	1	1	685	1	BRCA-LUAD+	C8-BLCA	cluster 2	Cluster 6	BRCA basal-like c6	squamous-like c4	miRNA cluster 5	cluster 2	mutation cluster 2	685	0	685	NO	NO		Progressive Disease	69	10	Wall Posterior	Lung/Bronchus				NA	-25342	260	685	0	272	NA	346	Non-Papillary			NA	Sister		MALE	NA	NA		Muscle invasive urothelial carcinoma (pT2 or above)	No		YES
TCGA-FD-A3SL-01	0	1	712	1	Kirc+	C8-BLCA	cluster 2	Cluster 5	BRCA basal-like c6	BLCA nonsquamous-like c1	miRNA cluster 5	cluster 2		260	1	712				Progressive Disease	60	NA	Dome|Wall Anterior|Wall Posterior	Lung/Bronchus|Colon			NO	NA	-22020	322	712	0	334	NA	260	Non-Papillary		YES	NA	Father|Mother		MALE	183	116	YES	Muscle invasive urothelial carcinoma (pT2 or above)	No	YES	YES
TCGA-FD-A3SS-01	0	1	391	1	Kirc+	C8-BLCA	cluster 2	Cluster 6	BRCA basal-like c6	BLCA nonsquamous-like c1	miRNA c1uster 9	cluster 4		220	1	391	YES	NO		Progressive Disease	66	NA	Dome|Trigone|Wall Anterior|Wall Lateral|Wall Posterior					NA	-24408	55	391	0	60	NA	220	Non-Papillary		YES	NA			MALE	173	87	NO	Muscle invasive urothelial carcinoma (pT2 or above)	No		YES
TCGA-FD-A6TD-01	1	1	386	1										386	0	386				Progressive Disease	77	NA	Wall Anterior|Wall Lateral|Wall Posterior			T1		NA	-28328	224	386	0	204	NA	NA	Non-Papillary			NA			MALE	193	148	YES	Muscle invasive urothelial carcinoma (pT2 or above)	No		YES
TCGA-GC-A3WC-01	1	0	540	0	Kirc+	C2-Squamous-like	cluster 1	Cluster 5	BRCA basal-like c6	squamous-like c4	miRNA cluster 5	cluster 2		540	0	540				Complete Response	80	23	Bladder - NOS	Gallbladder|Prostate|Multiple Myeloma	None			NA	-29295	119	NA	0	540	NA	NA	Non-Papillary			NA	Mother|Father|Brother		FEMALE	152	62	NO	Muscle invasive urothelial carcinoma (pT2 or above)	No		YES
TCGA-GC-A6I3-01	1	0	423	0										423	0	423				Complete Response	90	44	Bladder - NOS	NOS		T3a		NA	-32873	NA	NA	0	423	NA	NA	Non-Papillary		YES	2	Grandfather		FEMALE	139	132	NO	Muscle invasive urothelial carcinoma (pT2 or above)	No		YES
TCGA-GU-A763-01	1	0	997	0										997	0	997				Stable Disease	72	16	Wall Lateral	Ovary-NOS			NO	NA	-26527	447	NA	0	997	NA	NA	Papillary		YES	NA	Child		MALE	172	73	YES	Muscle invasive urothelial carcinoma (pT2 or above)	No	YES	YES
TCGA-GV-A3JV-01	0	1	434	1	Squamous	C1-LUAD-enriched	cluster 4	Cluster 6	squamous c3	BLCA nonsquamous-like c1	miRNA cluster 4	cluster 4	mutation c1uster 10	134	1	434		NO		Progressive Disease	66	31	Trigone	Prostate|Prostate		T3		NA	-24243	281	434	0	134	NA	134	Non-Papillary		YES	NA	Brother|Brother		MALE	172.7	76.7		Muscle invasive urothelial carcinoma (pT2 or above)	No		YES
TCGA-GV-A3JZ-01	1	0	603	0	High	C8-BLCA	cluster 3	Cluster 5	BRCA basal-like c6	BLCA nonsquamous-like c1			mutation cluster 13	603	0	603				Stable Disease	55	NA	Bladder - NOS		None			NA	-20420	132	NA	0	603	NA	NA	Non-Papillary		YES	NA			MALE	183	84		Muscle invasive urothelial carcinoma (pT2 or above)	No		YES
TCGA-K4-A3WS-01	1	0	761	0	Kirc+	C8-BLCA	cluster 2	Cluster 5	BRCA basal-like c6	BLCA nonsquamous-like c1	miRNA cluster 5	cluster 2		761	0	761				Complete Response	66	15	Trigone|Wall Lateral|Wall Posterior		Many including arsenic			NA	-24124	175	NA	0	761	NA	NA	Non-Papillary			NA			MALE	NA	292	NO	Muscle invasive urothelial carcinoma (pT2 or above)	No		YES
TCGA-K4-A3WV-01	1	0	646	0	Squamous	C2-Squamous-like	cluster 3	Cluster 13 (HNSC-LUSC)	BRCA basal-like c6	squamous-like c4	miRNA c1uster 9	cluster 4		646	0	646				Complete Response	77	20	Bladder - NOS					NA	-28444	143	NA	0	646	NA	NA	Non-Papillary			NA			FEMALE	NA	NA	NO	Muscle invasive urothelial carcinoma (pT2 or above)	No		YES
TCGA-K4-A4AC-01	0	1	278	1										170	1	278	NO	YES		Progressive Disease	83	NA	Bladder - NOS					NA	-30655	81	278	0	197	NA	170	Non-Papillary			NA			MALE	NA	NA	NO	Muscle invasive urothelial carcinoma (pT2 or above)	No		YES
TCGA-K4-A5RH-01	0	0	276	0										207	1	276	NO	YES		Progressive Disease	69	30	Trigone			TX		NA	-25305	221	NA	0	276	NA	207	Non-Papillary			NA			MALE	NA	NA	NO	Muscle invasive urothelial carcinoma (pT2 or above)	No		YES
TCGA-PQ-A6FN-01	1	0	507	0										507	0	507					78	19	Wall Lateral					NA	-28546	562	NA	0	507	NA	NA	Non-Papillary		NO	NA			FEMALE	170	70	NO	Muscle invasive urothelial carcinoma (pT2 or above)	No		YES
[truncated: 42 more columns]
